# Supplementary material
Source: Springer Nature journal article supplement (https://www.springermedizin.de/resource/supplementary/12937_2010_334_MOESM5_ESM.pdf/25653078)

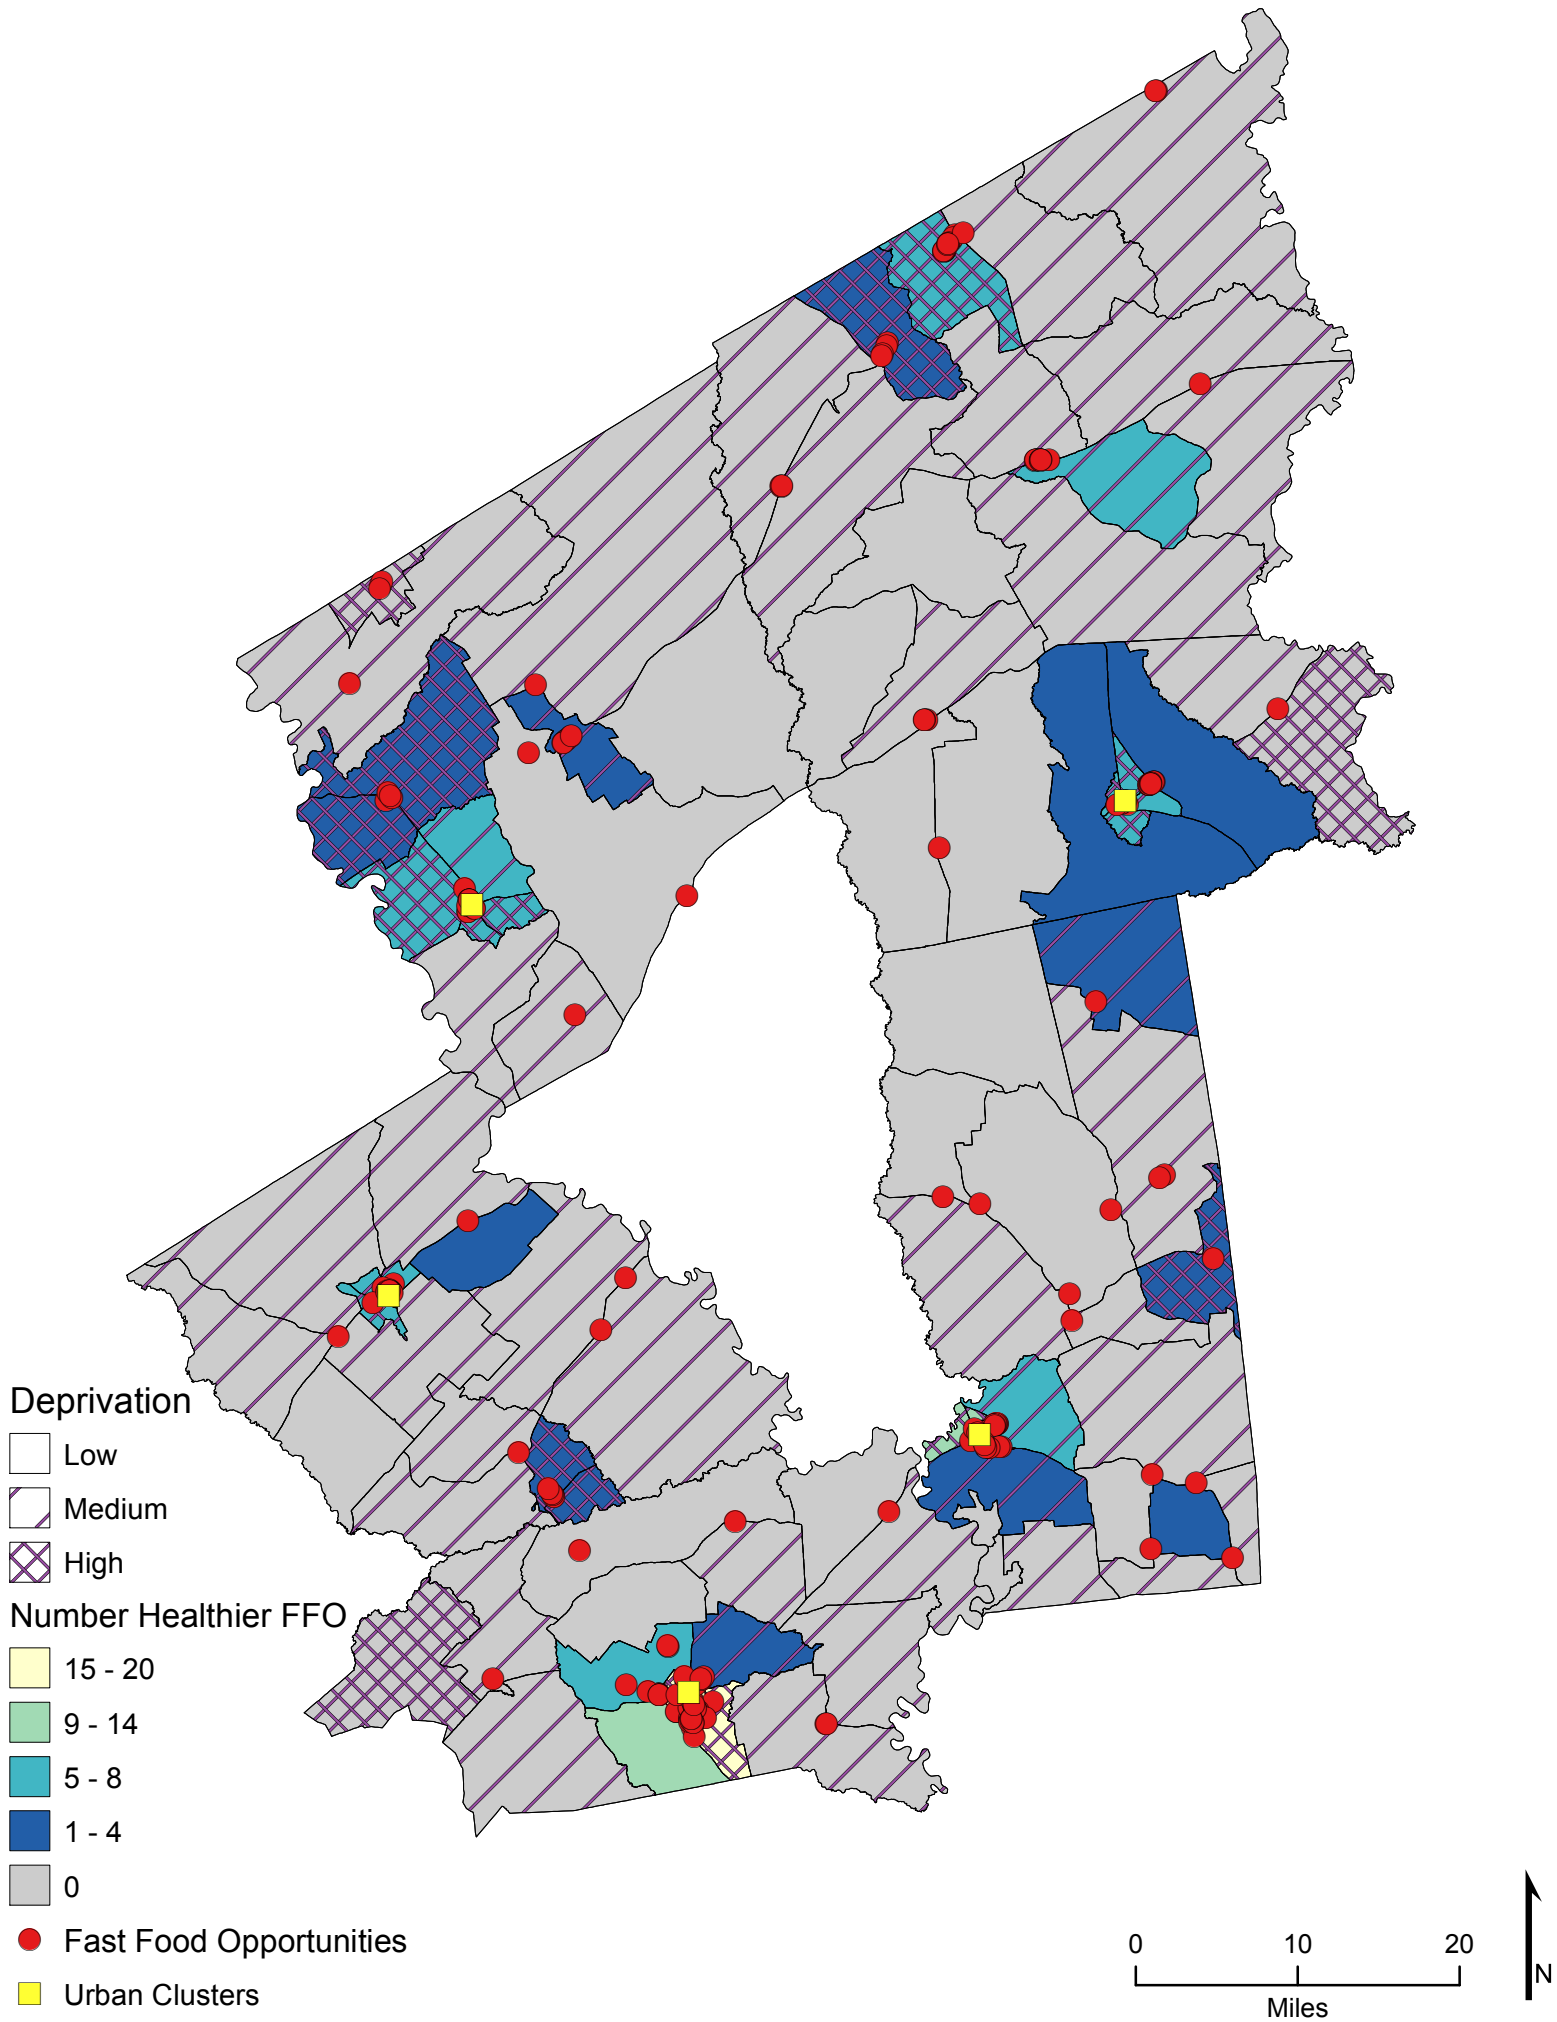

Supplement: MOESM5 [file 25653078]
